# Supplementary material
Source: PubMed Central journal article supplement (PMC6344625)
Supplement: c20514da24cae1d257e10a57d2cd4408_AEM.02223-18-s0001.pdf [file c20514da24cae1d257e10a57d2cd4408_AEM.02223-18-s0001.pdf]

## Supplemental Materials

### Identification of metabolites involved in the aerobic degradation of estrogen A/B-rings

Running title: Aerobic estrogen degradation pathway

Kan Wu,<sup>1\*</sup> Tzong-Huei Lee,<sup>2\*</sup> Yi-Lung Chen,<sup>1,5</sup> Yu-Sheng Wang,<sup>1</sup> Po-Hsiang Wang,<sup>1,6</sup> Chang-Ping Yu,<sup>3</sup> Kung-Hui Chu,<sup>4</sup> and Yin-Ru Chiang<sup>1#</sup>

<sup>1</sup>Biodiversity Research Center, Academia Sinica, Taipei 115, Taiwan.

<sup>2</sup>Institute of Fisheries Science, National Taiwan University, Taipei 106, Taiwan.

<sup>3</sup>Graduate Institute of Environmental Engineering, National Taiwan University, Taipei 106, Taiwan.

<sup>4</sup>Zachry Department of Civil Engineering, Texas A&M University, College Station, TX77843-3136

<sup>5</sup>Current affiliation: State Key Laboratory of Marine Environmental Science, Xiamen University, China

<sup>6</sup> Current affiliation: Department of Chemical Engineering and Applied Chemistry, University of Toronto, Toronto, Ontario, Canada

\*K. Wu and T.-H. Lee contributed equally to this work.

# Corresponding author: Yin-Ru Chiang, Biodiversity Research Center, Academia Sinica, 128 Academia Road Sec. 2, Taipei 115, Taiwan. E-mail: [yinru915@gate.sinica.edu.tw](mailto:yinru915@gate.sinica.edu.tw); Tel. (+886) 2 2787 2251; Fax (+886) 2 2789 9624.

**Keywords:** biodegradation,  $\beta$ -oxidation, estrogen, *Novosphingobium*, 2-oxoacid oxidoreductase, *Shingomonas*, steroid hormones

**Table S1.** UPLC-HRMS analysis of estrogen metabolites involved in aerobic estrone catabolism by strain SLCC.

| Compound ID                             | UPLC behavior (RT <sup>a</sup> , min) | Molecular formula/ (predicted molecular mass) <sup>b</sup> | Dominant ion peaks | Identification of product ions       | Mode observed |
|-----------------------------------------|---------------------------------------|------------------------------------------------------------|--------------------|--------------------------------------|---------------|
| estrone                                 | 8.11                                  | C <sub>18</sub> H <sub>22</sub> O <sub>2</sub><br>270.16   | 253.16             | [M-H <sub>2</sub> O+H] <sup>+</sup>  | ESI and APCI  |
|                                         |                                       |                                                            | 271.17             | [M+H] <sup>+</sup>                   | ESI and APCI  |
| pyridinestrone acid                     | 3.99                                  | C <sub>18</sub> H <sub>21</sub> O <sub>3</sub> N<br>299.15 | 282.17             | [M-H <sub>2</sub> O+H] <sup>+</sup>  | ESI and APCI  |
|                                         |                                       |                                                            | 300.15             | [M+H] <sup>+</sup>                   | ESI and APCI  |
|                                         |                                       |                                                            | 322.14             | [M+Na] <sup>+</sup>                  | ESI           |
| Compound Ie                             | 5.58                                  | C <sub>16</sub> H <sub>24</sub> O <sub>4</sub><br>280.17   | 245.16             | [M-2H <sub>2</sub> O+H] <sup>+</sup> | ESI and APCI  |
|                                         |                                       |                                                            | 263.16             | [M-H <sub>2</sub> O+H] <sup>+</sup>  | ESI and APCI  |
|                                         |                                       |                                                            | 281.17             | [M+H] <sup>+</sup>                   | ESI and APCI  |
|                                         |                                       |                                                            | 303.15             | [M+Na] <sup>+</sup>                  | ESI           |
| 4-norestrogonic acid<br>(Metabolite 5)* | 5.90                                  | C <sub>17</sub> H <sub>24</sub> O <sub>4</sub><br>292.17   | 257.15             | [M-2H <sub>2</sub> O+H] <sup>+</sup> | APCI          |
|                                         |                                       |                                                            | 275.17             | [M-H <sub>2</sub> O+H] <sup>+</sup>  | ESI and APCI  |
|                                         |                                       |                                                            | 293.17             | [M+H] <sup>+</sup>                   | ESI and APCI  |
|                                         |                                       |                                                            | 315.16             | [M+Na] <sup>+</sup>                  | ESI           |
| metabolite 7*                           | 6.22                                  | C <sub>17</sub> H <sub>24</sub> O <sub>5</sub><br>308.16   | 273.15             | [M-2H <sub>2</sub> O+H] <sup>+</sup> | APCI          |
|                                         |                                       |                                                            | 291.16             | [M-H <sub>2</sub> O+H] <sup>+</sup>  | ESI and APCI  |
|                                         |                                       |                                                            | 309.17             | [M+H] <sup>+</sup>                   | ESI and APCI  |
|                                         |                                       |                                                            | 331.15             | [M+Na] <sup>+</sup>                  | ESI           |
| metabolite 10*                          | 5.03                                  | C <sub>15</sub> H <sub>22</sub> O <sub>5</sub><br>282.15   | 247.14             | [M-2H <sub>2</sub> O+H] <sup>+</sup> | ESI and APCI  |
|                                         |                                       |                                                            | 265.15             | [M-H <sub>2</sub> O+H] <sup>+</sup>  | ESI and APCI  |
|                                         |                                       |                                                            | 283.15             | [M+H] <sup>+</sup>                   | ESI and APCI  |
|                                         |                                       |                                                            | 305.14             | [M+Na] <sup>+</sup>                  | ESI           |
| metabolite 11*                          | 5.44                                  | C <sub>15</sub> H <sub>20</sub> O <sub>5</sub><br>280.13   | 245.13             | [M-2H <sub>2</sub> O+H] <sup>+</sup> | APCI          |
|                                         |                                       |                                                            | 263.14             | [M-H <sub>2</sub> O+H] <sup>+</sup>  | ESI and APCI  |
|                                         |                                       |                                                            | 281.14             | [M+H] <sup>+</sup>                   | ESI and APCI  |
|                                         |                                       |                                                            | 303.13             | [M+Na] <sup>+</sup>                  | ESI           |
| metabolite 12*                          | 5.15                                  | C <sub>15</sub> H <sub>22</sub> O <sub>6</sub><br>298.14   | 263.15             | [M-2H <sub>2</sub> O+H] <sup>+</sup> | ESI and APCI  |
|                                         |                                       |                                                            | 281.16             | [M-H <sub>2</sub> O+H] <sup>+</sup>  | ESI and APCI  |
|                                         |                                       |                                                            | 299.15             | [M+H] <sup>+</sup>                   | ESI and APCI  |
| HIP                                     | 3.75                                  | C <sub>13</sub> H <sub>18</sub> O <sub>4</sub><br>238.12   | 221.12             | [M-H <sub>2</sub> O+H] <sup>+</sup>  | ESI and APCI  |
|                                         |                                       |                                                            | 239.13             | [M+H] <sup>+</sup>                   | ESI and APCI  |
|                                         |                                       |                                                            | 261.11             | [M+Na] <sup>+</sup>                  | ESI           |

<sup>a</sup>RT, retention time. <sup>b</sup>The predicted molecular mass was calculated using the atom mass of <sup>12</sup>C (12.00), <sup>16</sup>O (15.99), and <sup>1</sup>H (1.01). \*, the non-CoA structures deconjugated from the hypothetical CoA-ester intermediates were identified using UPLC-HRMS.

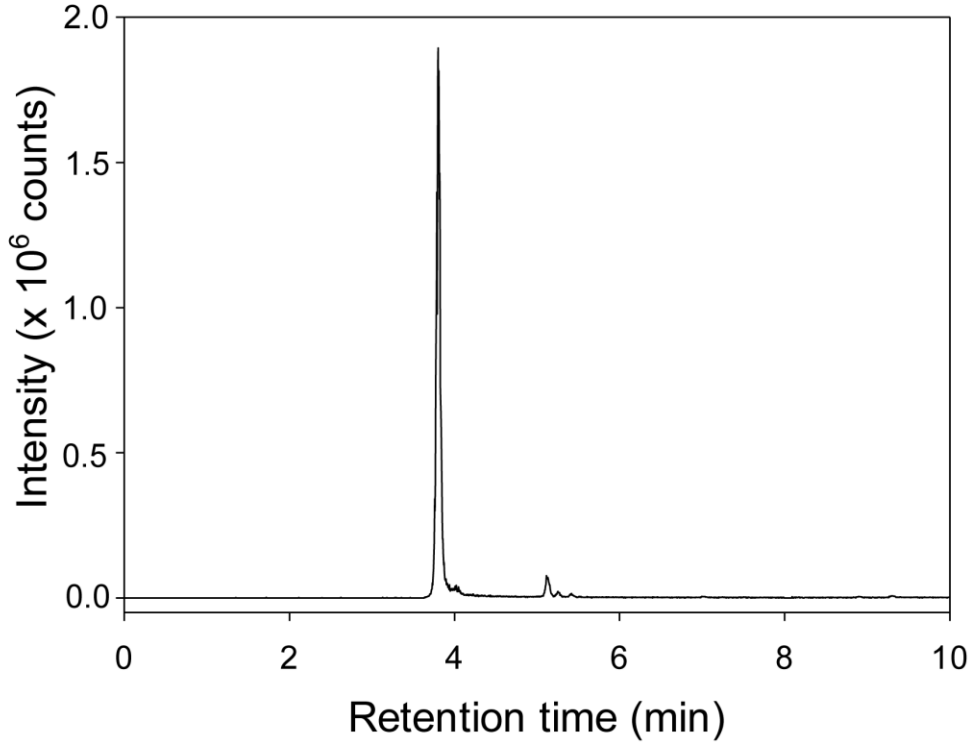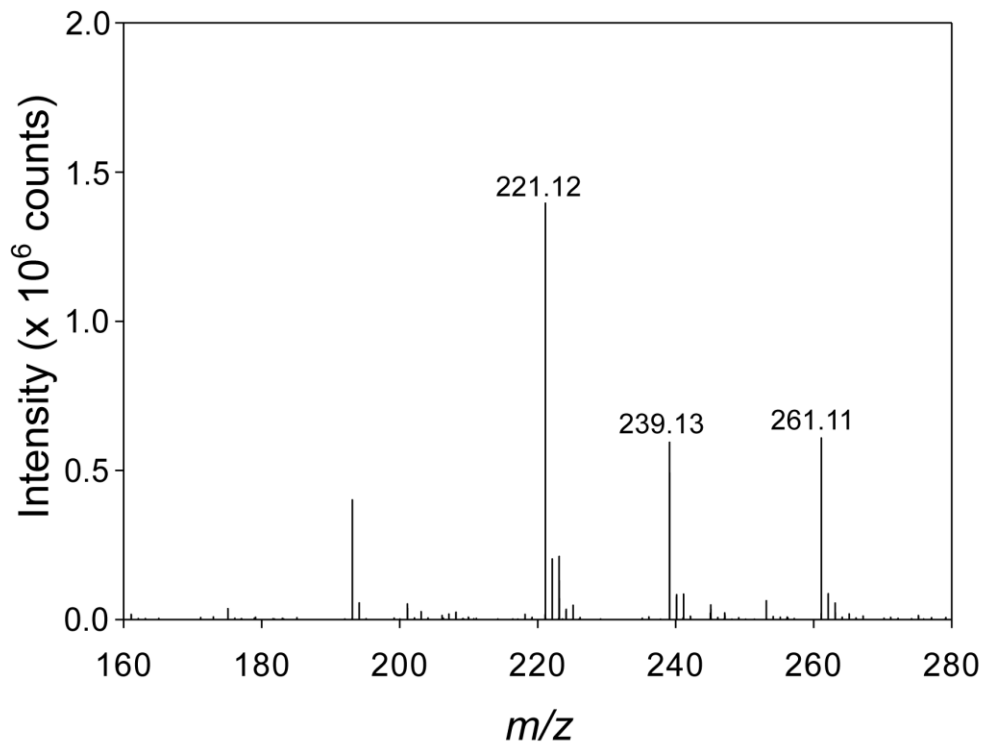

**Figure S1** UPLC–ESI–HRMS analysis of the authentic standard of HIP purchased from the Sigma-Aldrich.

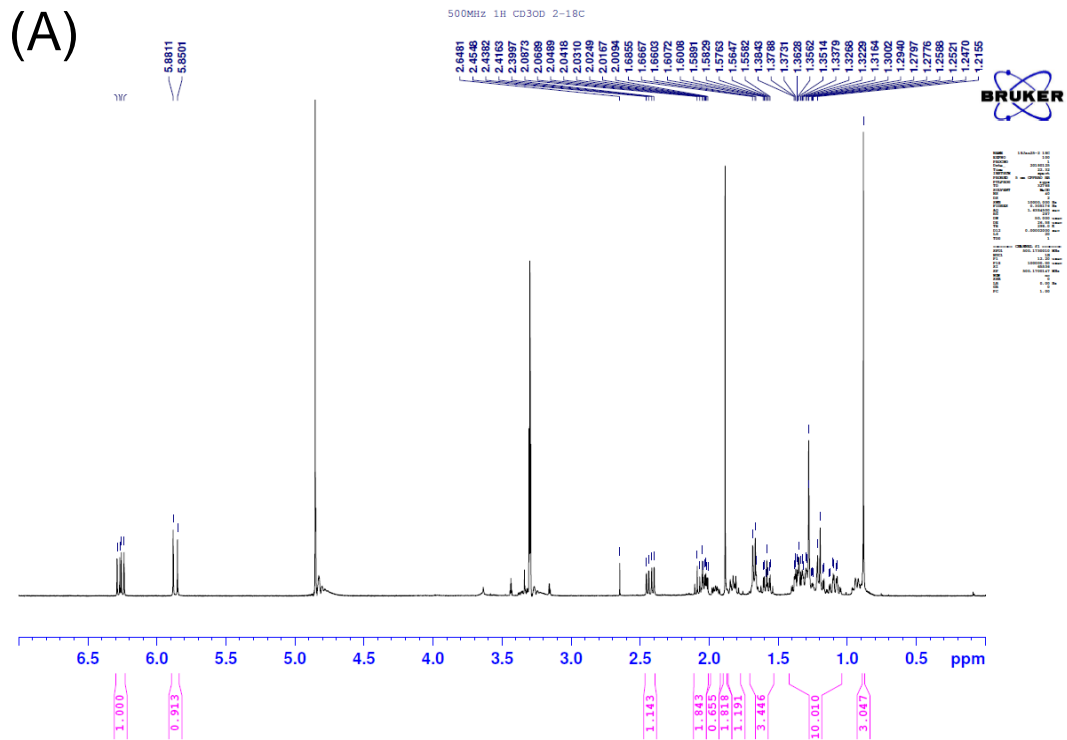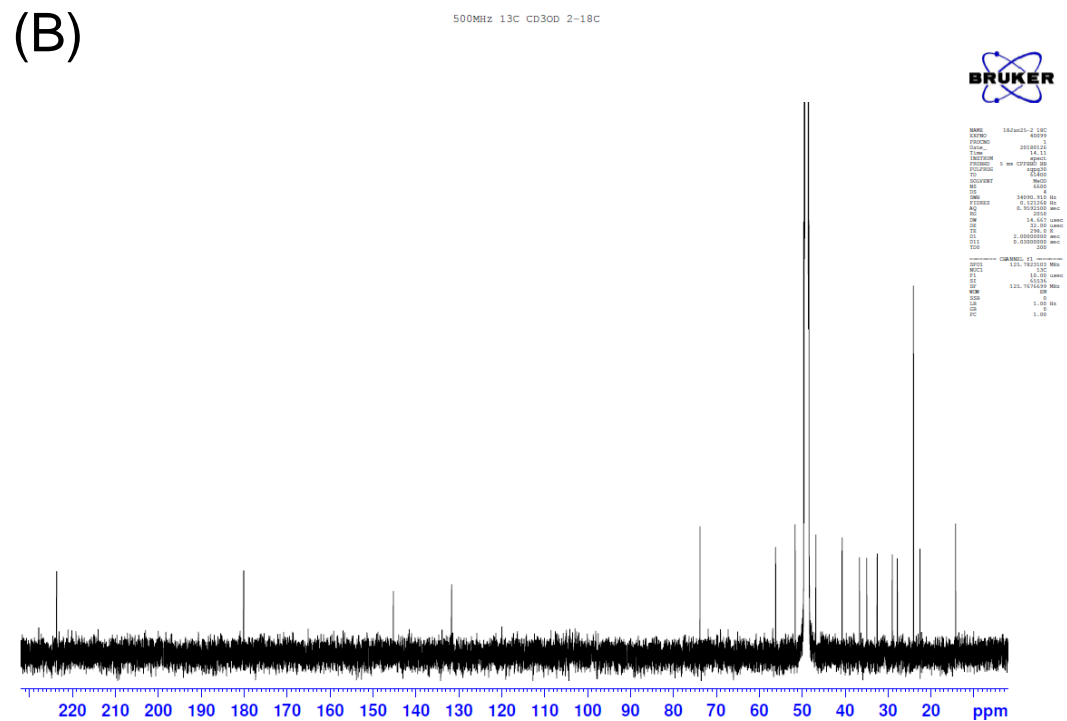

Figure S2  $^1\text{H}$ - (500 MHz) (A) and  $^{13}\text{C}$ -NMR (125 MHz) (B) spectra of 4-norestrogonic acid.

500MHz COSY CD30D 2-18C

(A)

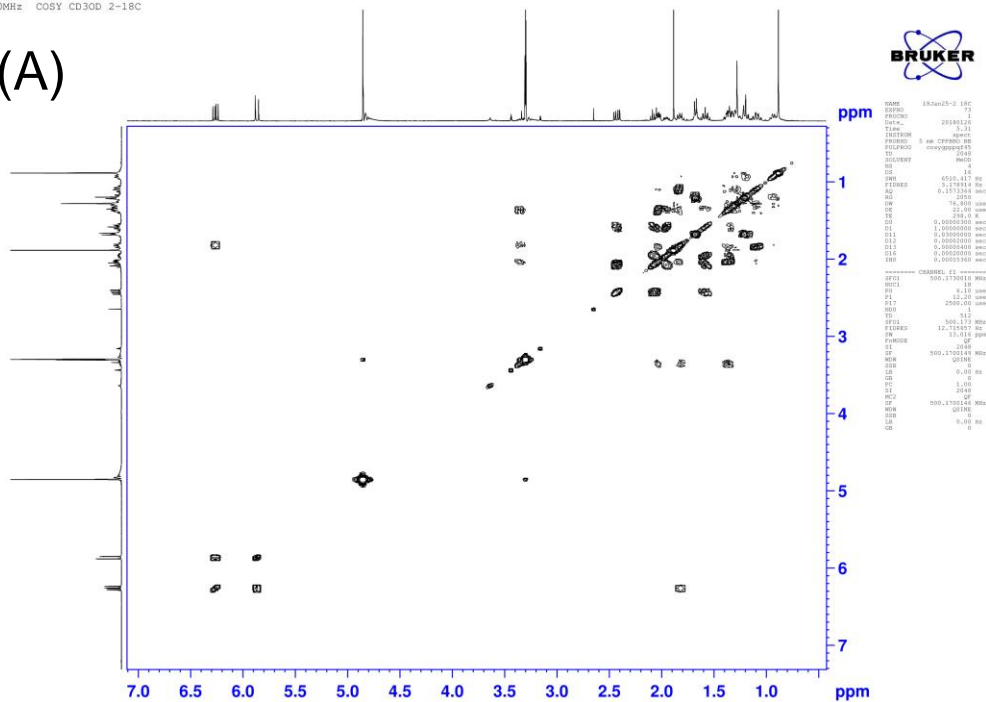

500MHz HMBC CD30D 2-18C

(B)

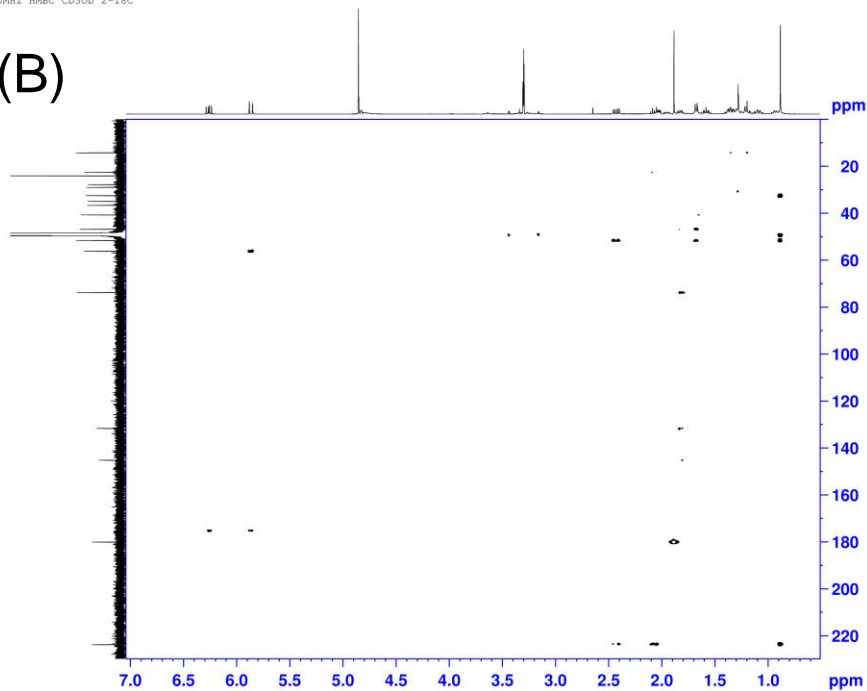

Figure S3 COSY (A) and HMBC (B) spectra of 4-norestrogonic acid.

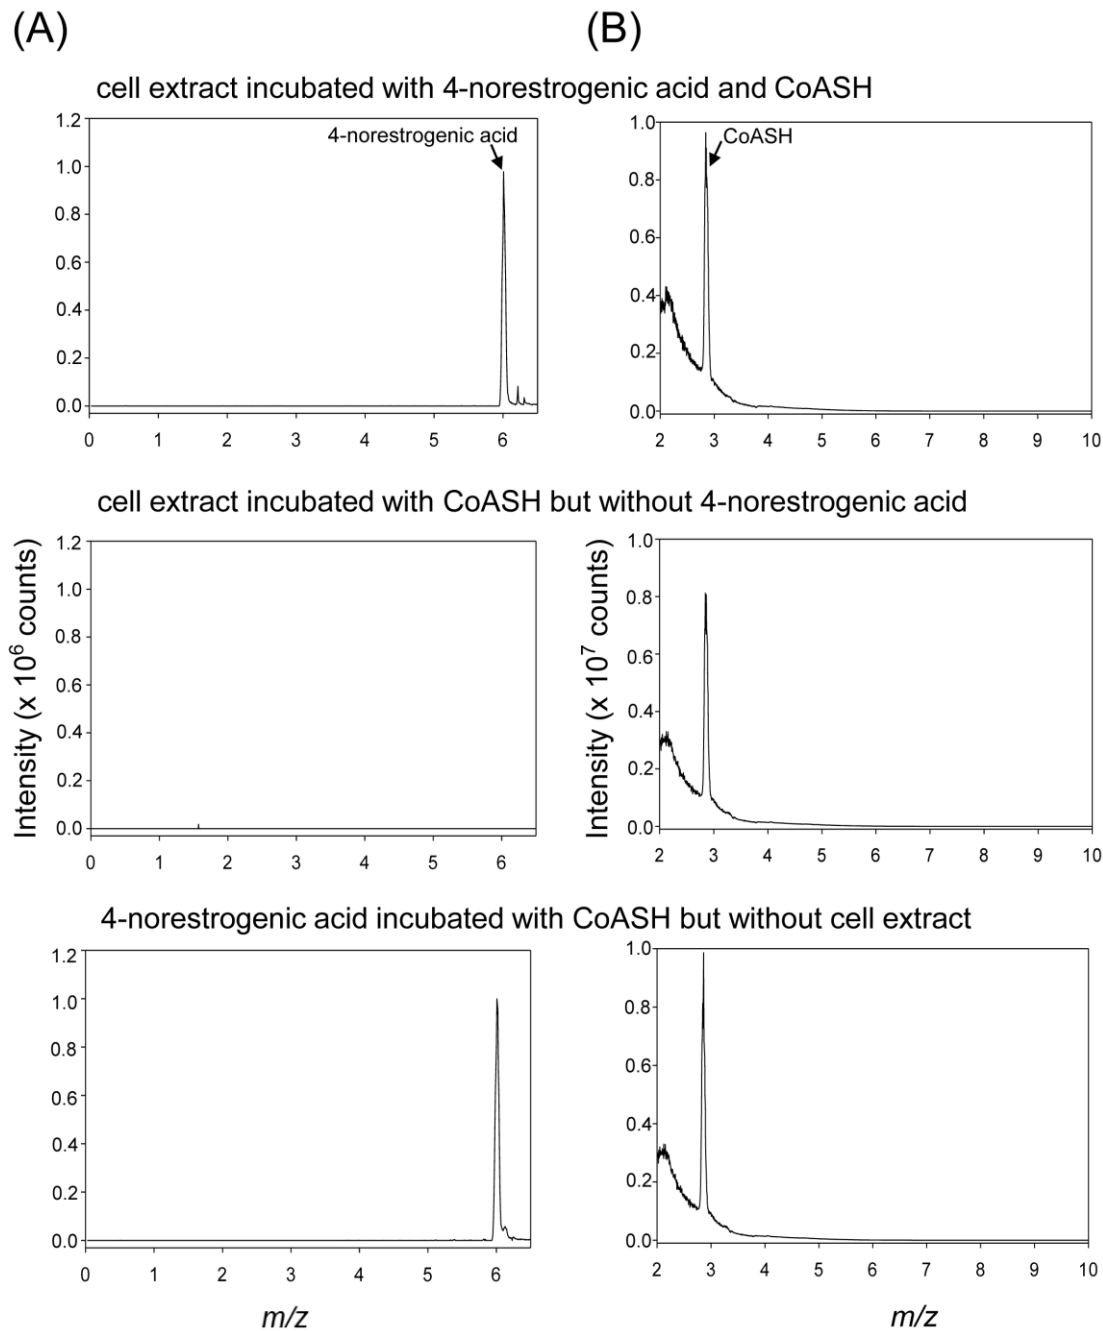

**Figure S4** UPLC–ESI–HRMS analysis of the strain KC8 cell extract incubated with 4-norestrogonic acid and CoASH. (A) Extracted ion chromatograms ( $m/z = 293.17$  for 4-norestrogonic acid) of the ethyl acetate extracts. (B) Total ion chromatograms ( $m/z = 700\sim 1200$ ) of the CoA-esters extracted from the reaction mixtures. The reaction mixture (1 mL) contained 0.5 mL of the strain KC8 proteins (20 mg/mL), 0.1 mM 4-norestrogonic acid, 1 mM CoASH, 5 mM ATP, and 10 mM  $MgSO_4$ . Negative controls were reaction mixtures without 4-norestrogonic acid (middle panel) or soluble proteins (lower panel). The reaction mixtures were incubated at 30 °C for 16 hours. The 4-norestrogonic acid and CoA-esters were extracted through liquid-liquid partition and solid phase extraction, respectively.

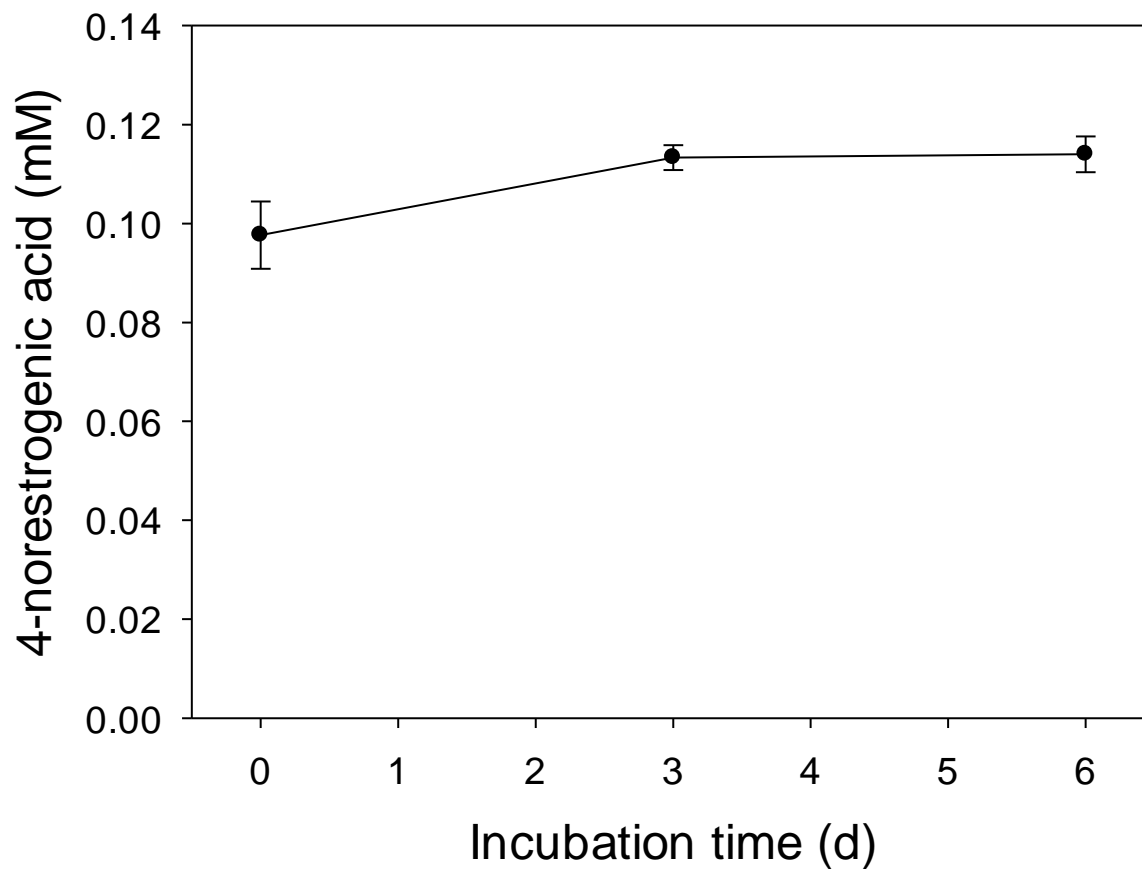

**Figure S5** Incubation of strain KC8 cells with 4-norestrogonic acid (0.1 mM) for 6 days. After different time intervals of incubation, samples (0.5 mL) were withdrawn from the bacterial culture. The bacterial cells were removed through centrifugation. 4-norestrogonic acid remaining in the supernatant was extracted using ethyl acetate, and the extracted 4-norestrogonic acid was quantified through UPLC–ESI–HRMS.
